# Supplementary material for: Surface engineering of porous silicon to optimise therapeutic antibody loading and release
Source: Royal Society of Chemistry journal article supplement (doi:10.1039/c5tb00397k), 2015-01-01
Supplement: c5tb00397k1.pdf [file c5tb00397k1.pdf]

## Supporting Information

### Surface engineering of porous silicon to optimise therapeutic antibody loading and release

Steven J. P. McInnes,<sup>a</sup> Chris T. Turner,<sup>b</sup> Sameer A. Al-Bataineh,<sup>b</sup> Marta J. I. Airaghi Leccardi,<sup>a</sup> Yazad Irani,<sup>c</sup> Keryn A. Williams,<sup>c</sup> Allison J. Cowin,<sup>b</sup> and Nicolas H. Voelcker<sup>a\*</sup>

<sup>a</sup> ARC Centre of Excellence in Convergent Bio-Nano Science and Technology, Mawson Institute, University of South Australia, Adelaide, South Australia 5001, Australia.

<sup>b</sup> Mawson Institute, University of South Australia, Adelaide, South Australia 5001, Australia.

<sup>c</sup> Department of Ophthalmology, Flinders University, Bedford Park, South Australia, Australia

**\*Corresponding author: Prof. Nicolas H. Voelcker**

GPO Box 2471, Adelaide, South Australia 5001, Australia

tel: +61 8 8302 5508, fax; +61 8 8302 5613

email: nico.voelcker@unisa.edu.au

## Infliximab loading optimisation

**Table S1:** Loading of Infliximab at concentrations > 1 mg/mL.

| <u>Infliximab Concentration (mg/mL)</u> | <u>Loading (mg/mg)</u> | <u>Loading Efficiency (%)</u> |
|-----------------------------------------|------------------------|-------------------------------|
| 1.0                                     | 0.063 ± 0.010          | 94.5                          |
| 2.4                                     | 0.159 ± 0.010          | 85.0                          |
| 5.2                                     | 0.225 ± 0.004          | 65.0                          |
| 8.3                                     | 0.321 ± 0.004          | 58.3                          |

## XPS Results

XPS was performed using an AXIS Ultra DLD spectrometer (Kratos Analytical, UK) equipped with a monochromatic Al K $\alpha$  radiation source (h $\nu$  - 1486.6 eV) at a power of 225 W. The pass energy for survey spectra, recorded over the energy range 0 - 1000 eV, was 160 eV with 0.5 eV step size and the pass energy for high-resolution C 1s spectra was 20 eV with 0.1 eV step size. The analysis area was approximately 700  $\mu$ m x 300  $\mu$ m. The spectra were acquired at a takeoff angle of 90°. Elements present on the surface were identified from survey spectra and quantified in atomic percentage (at. %) with CasaXPS Software (version 2.3.14, www.casaxps.com) using a Shirley-type background and applying the relative sensitivity factors supplied by the manufacturer of the instrument. In order to minimise X-ray-induced sample degradation, the exposure time was kept to the minimum required to obtain an adequate signal-to noise ratio. Charging effect of the samples during analysis was corrected using a reference value of 285.0 eV for the C 1s component of neutral hydrocarbon.<sup>1</sup>

Infliximab loaded and blank pSi-Ox surfaces were investigated via XPS to confirm the presence of protein in the pores after loading. Table 2 shows the at. % of elements found on both surfaces.

**Table S2:** At. % of loaded and non-loaded oxidised pSi surfaces.

| <u>Sample/Element</u> | <u>Non-loaded Oxidised pSi</u> | <u>Loaded Oxidised pSi</u> |
|-----------------------|--------------------------------|----------------------------|
| Si 2p                 | 42.26                          | 31.56                      |
| O 1s                  | 46.54                          | 40.07                      |
| C 1s                  | 11.19                          | 24.75                      |
| N 1s                  | 0.00                           | 3.62                       |

XPS analysis of unloaded and loaded pSi-Ox corroborated the findings from IR spectroscopy. The unloaded pSi-Ox showed high surface atomic percentage (at. %) signal for Si (42.26 at. %) and O (46.54 at. %), as expected from the presence of a silicon oxide layer. There was also the presence of slight contamination on the surface mainly from hydrocarbons. Importantly, all the fluorine from the etching process has been successfully removed. After loading oxidised pSi with Infliximab, the carbon increased significantly from 11.19 at. % to 24.75 at. %, whereas silicon decreased by 10.7 at. % to 31.56 at. %; attributed to the drug covering the surface causing a partial attenuation of the Si signal. The atomic percentage of oxygen did not change as much due to the protein also containing oxygen species (46.54 at. % to 40.07 at. %). As expected, nitrogen from the Infliximab could be detected on the loaded pSi-Ox surface at (3.62 at.%), whilst none appeared on the unloaded sample.

### **L929 BioAssay**

To screen the optimal release conditions for the Infliximab loaded into pSi MPs we used a bioassay based on L929 cells and their sensitivity to TNF- $\alpha$ . TNF- $\alpha$  is cytotoxic to L929 fibroblasts and hence can be used as a cell-based bioassay for TNF- $\alpha$ .<sup>2</sup> In this bioassay the addition of TNF- $\alpha$  causes cell death and a reduced ability of the L929 fibroblasts to convert the tetrazolium salt (MTT) to formazan, hence producing a decrease in the optical density at 570 nm. Supp Figure 5 shows the dose dependent response of the L929 cells with varying concentrations of TNF- $\alpha$  (0 - 100  $\mu\text{g}/\text{mL}$ ). These results are comparable to the earlier work of Cowin et al 2006.<sup>3</sup> When increasing concentrations of Infliximab (1 - 1000  $\mu\text{g}/\text{mL}$ ), a TNF- $\alpha$  neutralising antibody, were added to the cultures in the presence of a single dose of TNF- $\alpha$  (1  $\mu\text{g}/\text{mL}$ ), the antibody dose-dependently prevented TNF- $\alpha$ -induced cell death (Supp Figure 6). These results confirmed the L929 fibroblast as a sensitive bioassay for TNF- $\alpha$ . Sufficient recovery of L929 cells was observed at concentrations as low as 5 mg/mL of Infliximab.

## ToF-SIMS

**Table S3:** Positive ion fragments of Infliximab detected on loaded pSi-Ox surfaces and their corresponding amino acids over mass range 0 – 150 *m/z*.

| <u>Mass (<i>m/z</i>)</u> | <u>Positive fragment</u>                       | <u>Amino acid</u>         |
|--------------------------|------------------------------------------------|---------------------------|
| 30.036                   | CH <sub>4</sub> N                              | Glycine, Lysine           |
| 44.049                   | C <sub>2</sub> H <sub>6</sub> N                | Alanine                   |
| 56.05                    | C <sub>3</sub> H <sub>6</sub> N                | Lysine                    |
| 59.05                    | CH <sub>5</sub> N <sub>3</sub>                 | Arginine                  |
| 60.054                   | C <sub>2</sub> H <sub>6</sub> NO               | Serine                    |
| 61.018                   | C <sub>2</sub> H <sub>5</sub> S                | Methionine                |
| 68.05                    | C <sub>4</sub> H <sub>6</sub> N                | Proline                   |
| 69.043                   | C <sub>4</sub> H <sub>5</sub> O                | Threonine                 |
| 70.029                   | C <sub>3</sub> H <sub>4</sub> NO               | Asparagine                |
| 70.066                   | C <sub>4</sub> H <sub>8</sub> N                | Proline, arginine         |
| 71.014                   | C <sub>3</sub> H <sub>3</sub> O <sub>2</sub>   | Serine                    |
| 72.081                   | C <sub>4</sub> H <sub>10</sub> N               | Valine                    |
| 73.064                   | C <sub>2</sub> H <sub>7</sub> N <sub>3</sub>   | Arginine                  |
| 74.067                   | C <sub>3</sub> H <sub>8</sub> NO               | Threonine                 |
| 81.054                   | C <sub>4</sub> H <sub>5</sub> N <sub>2</sub>   | Histidine                 |
| 82.052                   | C <sub>4</sub> H <sub>6</sub> N <sub>2</sub>   | Histidine                 |
| 83.052                   | C <sub>5</sub> H <sub>7</sub> O                | Valine                    |
| 84.054                   | C <sub>4</sub> H <sub>6</sub> NO               | Glutamine, Glutamic acid  |
| 84.088                   | C <sub>5</sub> H <sub>10</sub> N               | Lysine                    |
| 86.097                   | C <sub>5</sub> H <sub>12</sub> N               | Leucine, isoleucine       |
| 87.06                    | C <sub>3</sub> H <sub>7</sub> N <sub>2</sub> O | Asparagine                |
| 88.046                   | C <sub>3</sub> H <sub>6</sub> NO <sub>2</sub>  | Asparagine, aspartic acid |
| 91.055                   | C <sub>7</sub> H <sub>7</sub>                  | Phenylalanine             |
| 98.019                   | C <sub>4</sub> H <sub>4</sub> NO <sub>2</sub>  | Asparagine                |
| 100.089                  | C <sub>4</sub> H <sub>10</sub> N <sub>3</sub>  | Arginine                  |
| 101.091                  | C <sub>4</sub> H <sub>11</sub> N <sub>3</sub>  | Arginine                  |
| 102.058                  | C <sub>4</sub> H <sub>8</sub> NO <sub>2</sub>  | Glutamic acid             |
| 104.062                  | C <sub>4</sub> H <sub>10</sub> NS              | Methionine                |
| 107.059                  | C <sub>7</sub> H <sub>7</sub> O                | Tyrosine                  |
| 110.077                  | C <sub>5</sub> H <sub>8</sub> N <sub>3</sub>   | Histidine, arginine       |
| 120.089                  | C <sub>8</sub> H <sub>10</sub> N               | Phenylalanine             |
| 127.1                    | C <sub>5</sub> H <sub>11</sub> N <sub>4</sub>  | Arginine                  |
| 130.073                  | C <sub>9</sub> H <sub>8</sub> N                | Tryptophane               |
| 131.055                  | C <sub>9</sub> H <sub>7</sub> O                | Phenylalanine             |
| 132.064                  | C <sub>9</sub> H <sub>8</sub> O                | Phenylalanine             |
| 136.083                  | C <sub>8</sub> H <sub>10</sub> NO              | Tyrosine                  |

## Characterization of microporous surface layers

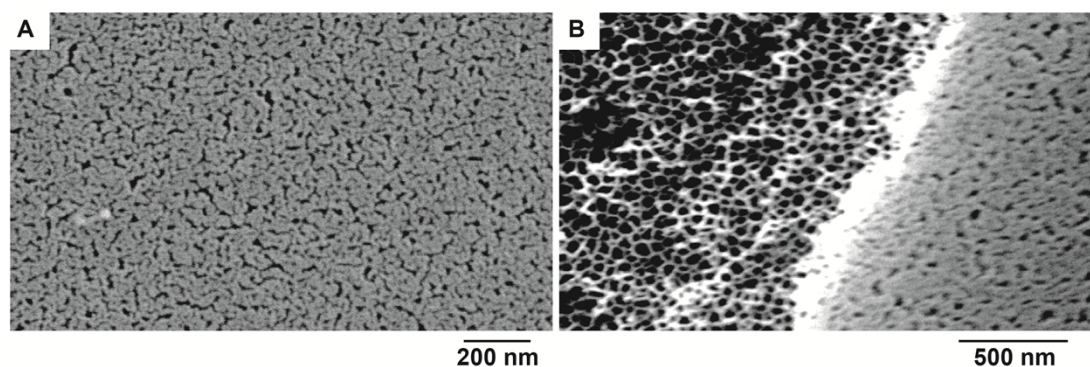

**Figure S1:** (A) SEM of the microporous layer remaining above pSi etches if not removed via techniques such as NaOH dissolution or sacrificial etching and (B) A defect site in the films shown in (A) showing both the microporous layer and the desired porous layer beneath it.

## Error analysis in EOT readings

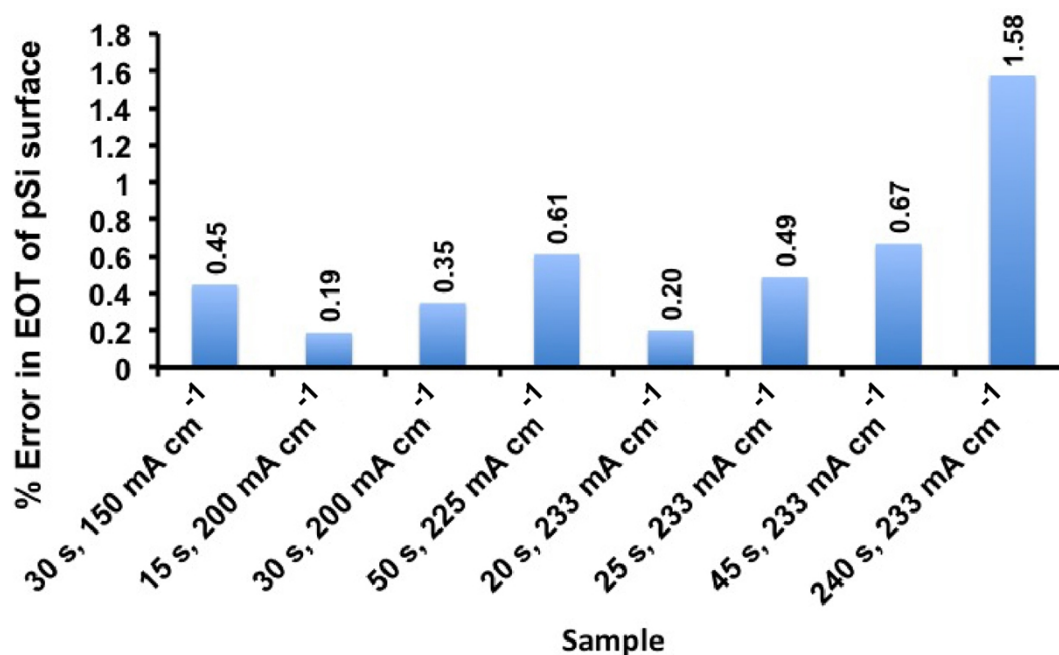

**Figure S2:** EOT readings of the different etching conditions (time and current) (n = 20).

### Zeta potential measurements at pH 6.5 and 5.5

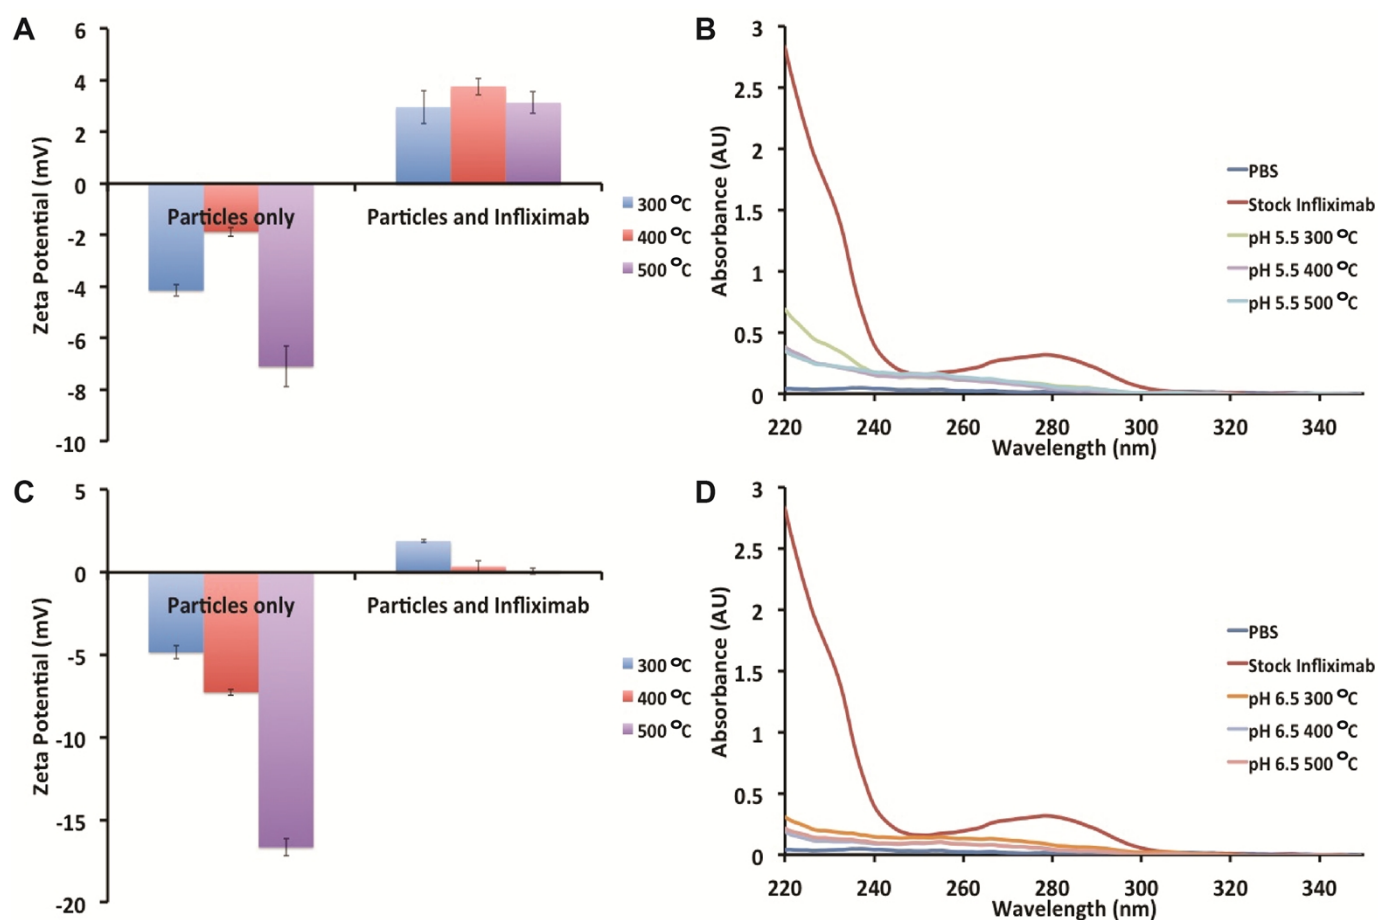

**Figure S3:** Zeta potential measurements of the Inflximab binding at to 300 °C, 400 °C and 500 °C oxidised pSi at (A) pH 5.5 and (B) corresponding UV-Vis monitoring of the Inflximab in solution during the zeta-potential binding experiment in panel (A). (C) Zeta potential measurements of the Inflximab binding at to 300 °C, 400 °C and 500 °C oxidised pSi at pH 6.5 for different oxidation conditions (n=3) and (D) UV-Vis monitoring of the Inflximab in solution during the zeta-potential binding experiment in panel C at pH 6.5 (n = 3).

## ToF-SIMS mass spectra

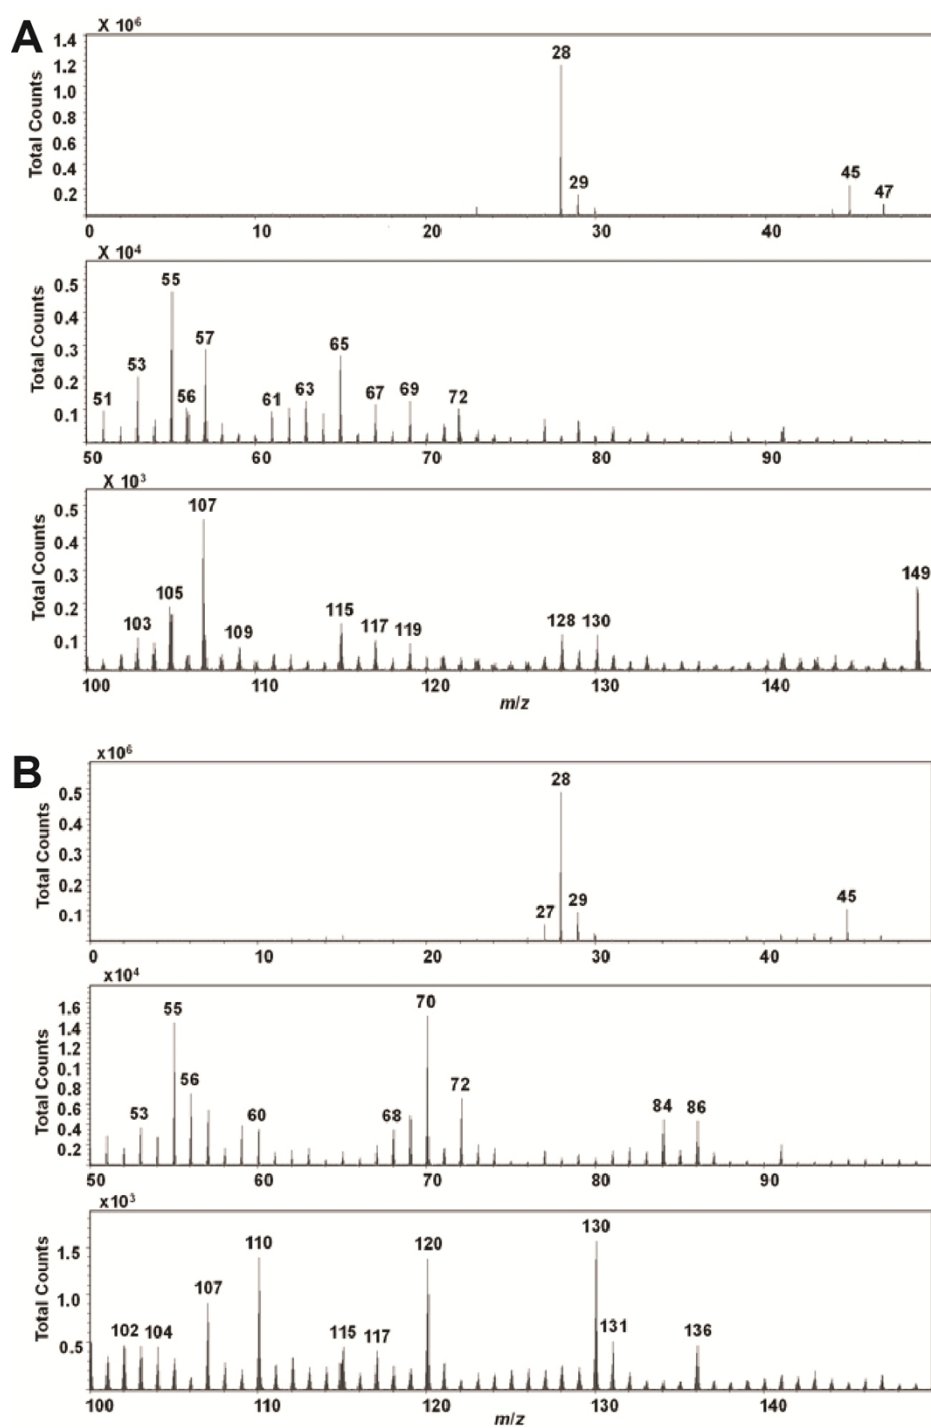

**Figure S4:** Positive ion ToF-SIMS mass spectra (0 – 150  $m/z$ ) for (A) unloaded and (B) Infliximab-loaded pSi MPs.

## L929 bioassay optimization

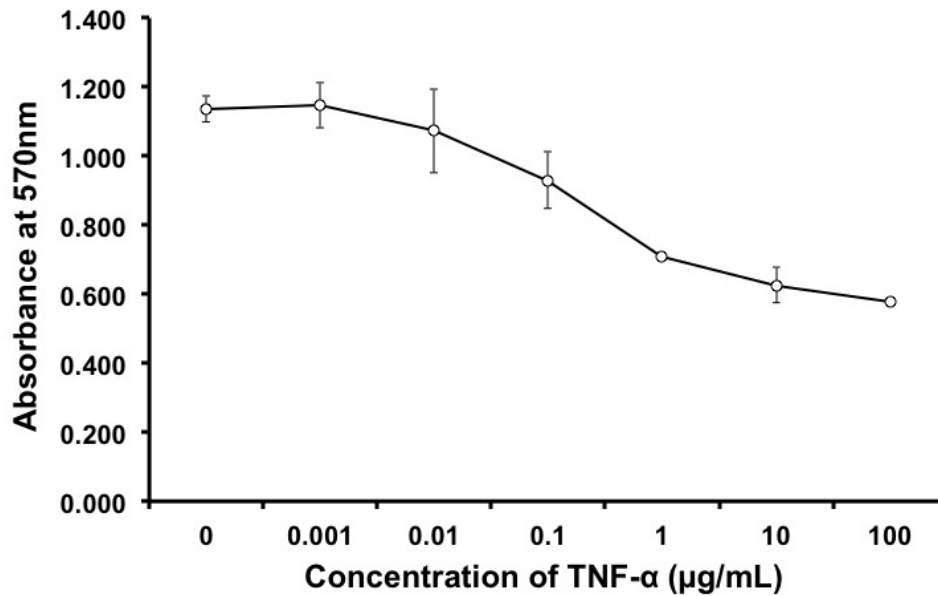

**Figure S5:** MTT assay to determine the viability of TNF- $\alpha$ -treated L929 cells. Increasing doses of human TNF- $\alpha$  was added to L929 cells, with viability measured using the absorbance at 570 nm. Data is presented as mean  $\pm$  one standard deviation (n = 4).

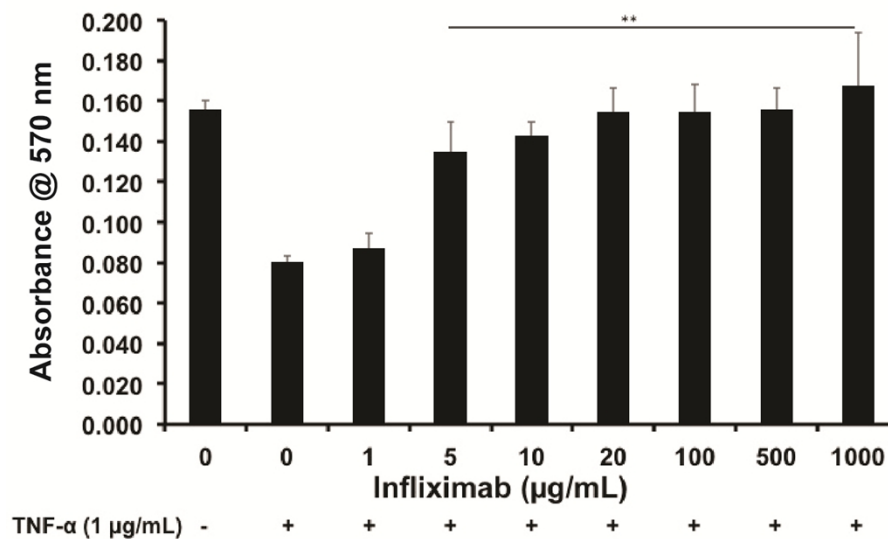

**Figure S6:** MTT assay to measure Infiximab-induced recovery of TNF- $\alpha$ -treated L929 cells. Increasing concentrations of Infiximab was incubated with 1  $\mu$ g/mL human TNF- $\alpha$  for 10 minutes at 37°C, and then added to L929 cells. MTT assay was used to measure L929 cell viability using absorbance at 570 nm. Data is presented as mean  $\pm$  one standard deviation (n = 4).



## Stability of Infliximab at various pH, temperatures and incubation times

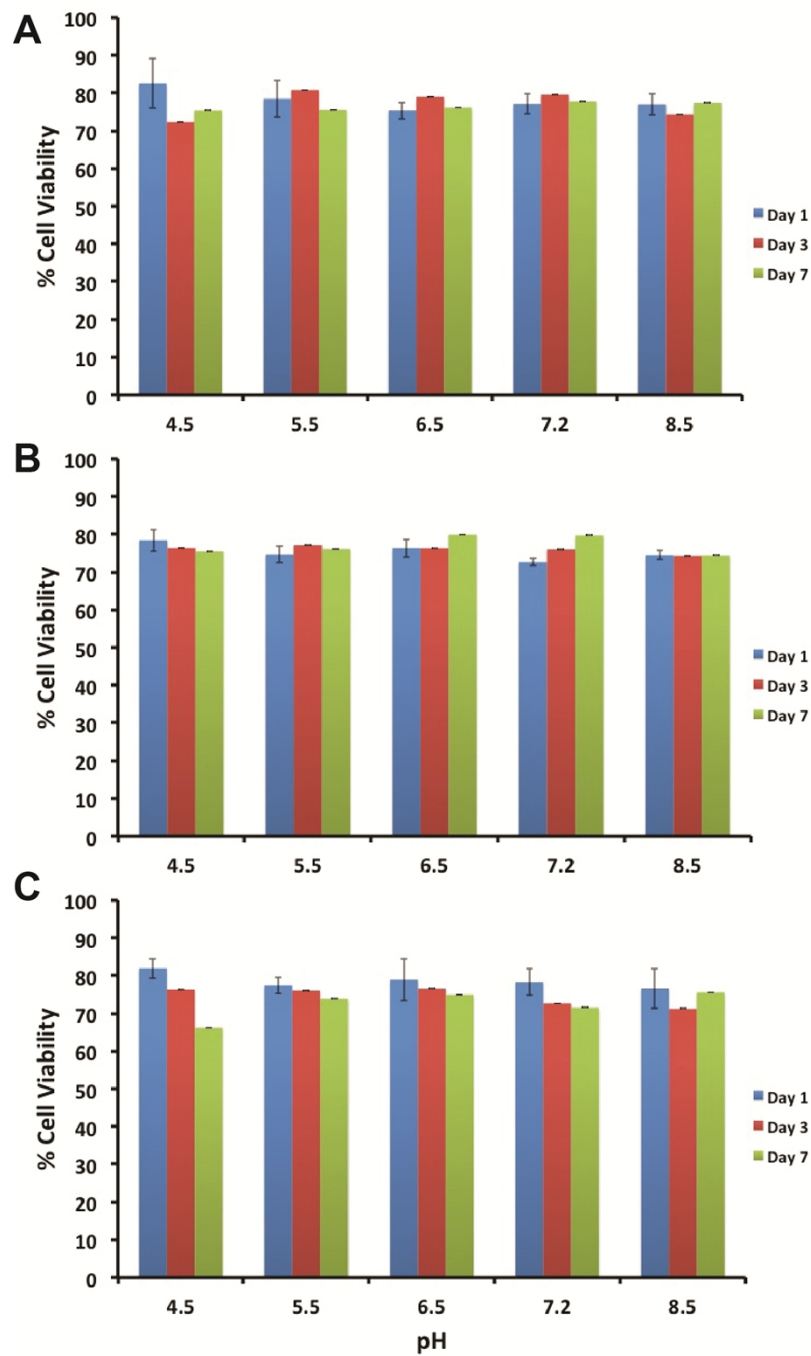

**Figure S7:** Effect of pH and temperature on the functionality of Infliximab. Infliximab (1 mg/mL) was incubated in pH adjusted PBS at 4 °C (A), 25 °C (B) and 37 °C (C). Samples were then incubated with 1 µg/mL human TNF- $\alpha$  for 10 minutes at 37°C, and then added to L929 cells. MTT assay was used to measure L929 cell viability using absorbance at 570 nm. Data is presented as mean +/- one standard deviation (n = 3). Data is presented as a % of cell viability.

## References

1. G. Beamson and D. Briggs, *High resolution XPS of organic polymers*, John Wiley and Sons, Chichester, UK, 1992.
2. F. Denizot and R. Lang, *J. Immunol. Methods*, 1986, **89**, 271–277.
3. A. J. Cowin, N. Hatzirodos, J. Rigden, R. Fitridge, and D. A. Belford, *Wound Repair Regen.*, 2006, **14**, 421–426.
